# Supplementary material
Source: PubMed Central journal article supplement (PMC3697640)
Supplement: JB.00195-13_zjb999092672so1.pdf [file JB.00195-13_zjb999092672so1.pdf]

**Table S1: Enzymes proposed to require SAM as cofactor encoded in the *A. asiaticus* genome.**

| <i>A. asiaticus</i> locus_tag | Description                                                              | Best hit in UniProtKB/Swiss-Prot (considering only functionally characterized proteins), (GenBank accession number, % amino acid identity) | PFAM family                                                                                                                                        |
|-------------------------------|--------------------------------------------------------------------------|--------------------------------------------------------------------------------------------------------------------------------------------|----------------------------------------------------------------------------------------------------------------------------------------------------|
| Aasi_0005                     | TrmA family tRNA (Uracil-5-)-methyltransferase                           | RlmCD <i>Bacillus subtilis</i> 168 (CAB12493.1., 31%)                                                                                      | tRNA (Uracil-5-)-methyltransferase (PF05958)                                                                                                       |
| Aasi_0010                     | TrmD; tRNA (guanine-N(1)-)-methyltransferase [EC: 2.1.1.228]             | TrmD <i>E. coli</i> (YP_490830.1 ,40%)                                                                                                     | tRNA (Guanine-1)-methyltransferase (PF01746)                                                                                                       |
| Aasi_0020                     | HemK/PrmC family modification methylase                                  | PrmB <i>E. coli</i> (AAC75390.2 ,33%)                                                                                                      | Methyltransferase small domain (PF05175)                                                                                                           |
| Aasi_0275                     | GlyA Serine hydroxymethyltransferase [EC: 2.1.2.1]                       | GlyA <i>B. subtilis</i> (CAA86110.1, 54%)                                                                                                  | Serine hydroxymethyltransferase (PF00464)                                                                                                          |
| Aasi_0280                     | Putative 6-O-methylguanine DNA methyltransferase                         | Ogt <i>E. coli</i> (CAA68548.1, 34%)                                                                                                       | 6-O-methylguanine DNA methyltransferase, DNA binding domain (PF01035)                                                                              |
| Aasi_0286                     | Methylated-DNA-protein-cysteine methyltransferase [EC: 2.1.1.63]         | Ada <i>E. coli</i> (AAA23412.1, 29%)                                                                                                       | 6-O-methylguanine DNA methyltransferase, DNA binding domain (PF01035); 6-O-methylguanine DNA methyltransferase, ribonuclease-like domain (PF02870) |
| Aasi_0466                     | GidB/rsmG; ribosomal RNA small subunit methyltransferase G [EC: 2.1.1.-] | RsmG <i>B. subtilis</i> (CAA44405.1, 34%)                                                                                                  | rRNA small subunit methyltransferase G (PF02527)                                                                                                   |
| Aasi_0566                     | Putative O-methyltransferase                                             | COMTD1 <i>H. sapiens</i> (AAQ88840.1, 30%)                                                                                                 | O-methyltransferase (PF01596)                                                                                                                      |
| Aasi_0584                     | Tetrapyrrole methylase family protein                                    | RsmI <i>E. coli</i> (AAC76180.1, 30%)                                                                                                      | Tetrapyrrole (Corrin/Porphyrin) Methylases (PF00590)                                                                                               |
| Aasi_0766                     | RNA methyltransferase                                                    | RlmB <i>E. coli</i> (AAA97076.1, 29%)                                                                                                      | SpoU rRNA Methylase family (PF00588)                                                                                                               |
| Aasi_1616                     | RlmN; ribosomal RNA large subunit methyltransferase N [EC: 2.1.1.192]    | RlmN <i>E. coli</i> (AAA21359.1, 44%)                                                                                                      | Radical SAM superfamily (PF04055)                                                                                                                  |
| Aasi_0780                     | QueA; S-adenosylmethionine:tRNA ribosyltransferase-isomerase             | QueA <i>B. subtilis</i> (CAB75332.1, 39%)                                                                                                  | Queuosine biosynthesis protein (PF02547)                                                                                                           |
| Aasi_1647                     | RNA methyltransferase, TrmH family                                       | RlmB <i>E. coli</i> (AAA97076.1, 26%)                                                                                                      | SpoU rRNA Methylase family (PF00588)                                                                                                               |
| Aasi_0908                     | RsmH; Ribosomal RNA small subunit methyltransferase H [EC: 2.1.1.199]    | RsmH <i>E. coli</i> (CAA36283.1, 41%)                                                                                                      | MraW methylase family (PF01795)                                                                                                                    |
| Aasi_1135                     | Protein-L-isoaspartate(D-aspartate) O-methyltransferase [EC: 2.1.1.77]   | Pcm <i>E. coli</i> (AAA24302.1, 34%)                                                                                                       | Protein-L-isoaspartate(D-aspartate) O-methyltransferase (PCMT) (PF01135)                                                                           |
| Aasi_1164                     | RNA methyltransferase, TrmH family                                       | RlmB <i>E. coli</i> (AAA97076.1, 37%)                                                                                                      | SpoU rRNA Methylase family (PF00588)                                                                                                               |
| Aasi_1234                     | Putative methyltransferase                                               | UbiE <i>E. coli</i> (AAA67628.1, 22%)                                                                                                      | Methyltransferase domain (PF13847)                                                                                                                 |

```

Aasi_1859      1  IK-----YF-----KAIFFWTLTSLIVSCGNDAITKYLGYTFNPWQITFFR
RP076          1  MNDAKTYL-----NGICWFLLSLVTSSINDVMSKYLGTRLHSFEVAFFR
CTL0843       1  MV-AVKALFACLRRTCVMFKPCCDMAIFLIFLNAFIWSSSFALSKSAMEAAAPLFVTGSR
consensus     1  . . . . . * . . . . . * . . . . . * . . . . . * . . . . . *

Aasi_1859     41  FAFCIITLLPVMLYQKSAFITTYRWKLIH--FLRGLFVFAISLWSQ-GIKVSPITTTSTIM
RP076          46  FFFSSIVLLPFVYVYGNALKTSRPFVH--VLRGLLFFGMTSWTY-GLTIAPVTTATVV
CTL0843       60  MVLAGVVLFGLLLCK-RESLRLRPAIMPVIVLSVIGFYLTNVLEF IGLQRLSSSTACFI
consensus     61  . . . . . * . . . . . * . . . . . * . . . . . * . . . . . *

Aasi_1859     98  SFTVPITFVLVLAPIFLKERVTWPMWLATLGGFVG-ILFVLQPDVHTFN-----QGSL
RP076        103  SFAIPLEFTLLAVFILNENI IWQRWVTVVGFIG-LVVMLKPHTKDFN-----PEIL
CTL0843      119  YGFSPTAAFCSYQLREVVTKKLGELSICGLVSYLVYILFGGSEDVAEWGWQLGLPELL
consensus    121  . . . * . . . . . * * . . . * . . . . . * . . . . . *

Aasi_1859    149  FFIILAAILFGMLDILNK--KYVTOEPMLCMLFYSTVVALIILVT--FPAMQVWR-TPTNYE
RP076        154  YLIIAAISFAMLDIINK--KEVVKESMLSMFYSAIVTAMVSI--PVAMQYWI-TPSSFE
CTL0843      179  LI AATC LSSYGWTLRKLGRRCESLSMTAINAYAMVIAGVLSLIHSAVTEVWNPVVENP
consensus    181  . . . . . * . . . . . * . . . . . * . . . . . * . . . . . *

Aasi_1859    204  LMWLLVLG---IGSNLILYC---ILRAFSLTDASSLSPFRYIELLISMVVGYVFFHE-L
RP076        209  LALFVLG---SSGSFILF---LLKAFSIVDATATAPRYLELVISATAAYFI FNE-F
CTL0843      239  LLFLQALGALVIFSNLICYNLFAKLLRSFS---SIFLSFCNLVMPLFASF FGWLLLGESF
consensus    241  * . . * . . . . . * . . . . . * . . . . . * . . . . . *

Aasi_1859    256  PSSSYLGAAIIIPSTLFIGYYQTRNOP---KA
RP076        261  PDKSIVHGAVIIIPATLFIYSEKKSMSKHEsq
CTL0843      296  PPGLLEAVCFMVLGCRL--IYHEEFROGYVLTSE
consensus    301  * . . . . . * . . . . . * . . . . . *

```

**Figure S1. Amino acid sequence alignment of SAM-transport proteins.** The alignment was done with MAFFT (35), shading of conserved amino acid residues was performed with Boxshade available at the Swiss EMBnet server (<http://www.ch.embnet.org/index.html>). Identical amino acid residues are highlighted in black and similar residues in grey. A consensus line is displayed at the bottom of each alignment block, an asterisk indicates identical positions, and a dot indicates similar positions.

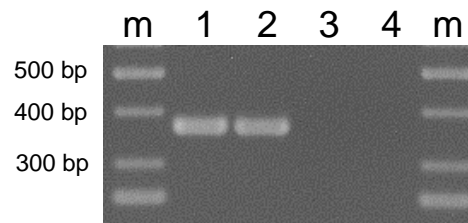

**Figure S2. Transcription of *Aasi\_1859* during intracellular growth of *A. asiaticus* within its *Acanthamoeba* host.** Transcription of *Aasi\_1859* was analyzed with reverse transcriptase PCR. Lane 1: PCR positive controls using *A. asiaticus* DNA; lane 2: amplification products of cDNA synthesized from whole RNA from amoebae harboring *A. asiaticus*; lane 3: PCR using whole RNA from amoebae containing *A. asiaticus* (control for the absence of DNA in the RNA preparation, no reverse transcriptase added); lane 4: PCR negative control (no DNA added); **m**: molecular-size marker. The RT-PCR products shown in lane 2 are derived from two biological replicates.

**Figure S3: Structure of potential substrates/inhibitors tested in the effector analysis.**

Structures were obtained from PubChem (<http://pubchem.ncbi.nlm.nih.gov/search/>).

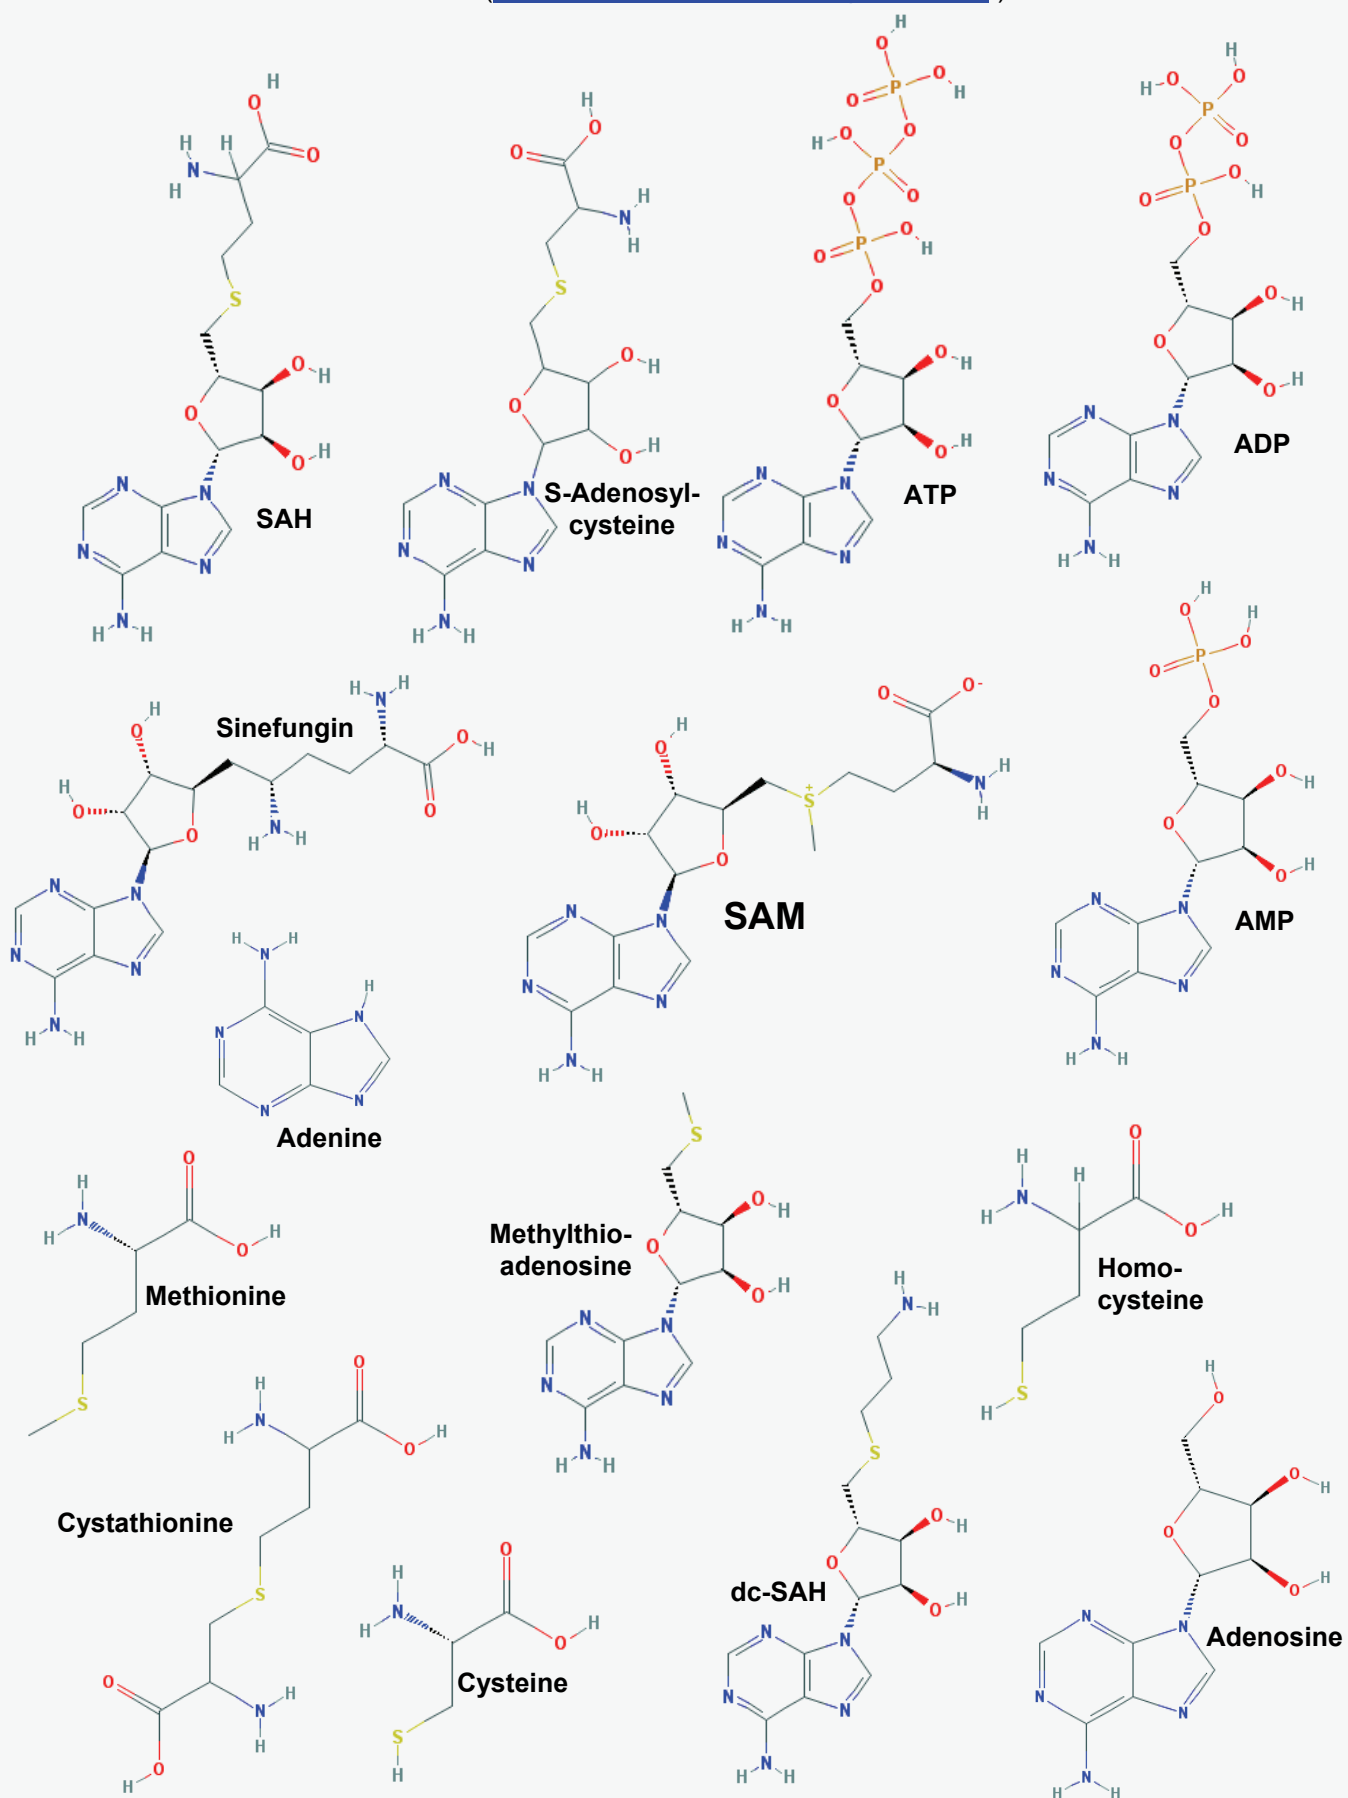

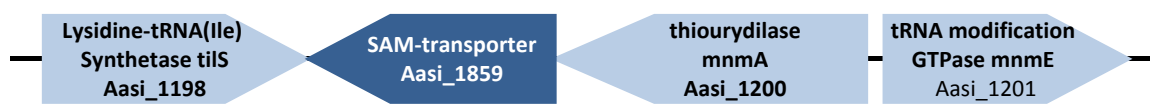

**Fig. S4:** Genomic organization of Aasi\_1859 and surrounding genes
